# Supplementary material for: Phenotypic profiling of pancreatic ductal adenocarcinoma plasma-derived small extracellular vesicles for cancer diagnosis and cancer stage prediction: a proof-of-concept study
Source: Royal Society of Chemistry journal article supplement (doi:10.1039/d2ay00536k), 2022-01-01
Supplement: d2ay00536k1.pdf [file d2ay00536k1.pdf]

## Supporting Information

### Phenotypic profiling of pancreatic ductal adenocarcinoma plasma-derived small extracellular vesicles for cancer diagnosis and cancer stage prediction: a proof-of-concept study

Wei Zhang<sup>a</sup>, Ling Wang<sup>b</sup>, Dan Li<sup>c\*</sup>, Douglas H. Campbell<sup>d</sup>, Bradley J. Walsh<sup>d</sup>, Nicolle H. Packer<sup>a</sup>, Qing Dong<sup>c</sup>, Erkang Wang<sup>c\*</sup>, and Yuling Wang<sup>a\*</sup>

<sup>a</sup> ARC Centre of Excellence for Nanoscale BioPhotonics (CNBP), School of Natural Sciences, Faculty of Science and Engineering, Macquarie University, Macquarie University, Sydney, NSW 2109, Australia

<sup>b</sup> Department of Gynecology and Obstetrics, The Second Hospital of Jilin University, Changchun 130041, Jilin, P.R. China

<sup>c</sup> State key laboratory of Electroanalytical Chemistry, Changchun Institute of Applied Chemistry, Chinese Academy of Science, Changchun 130022, Jilin, P.R. China

<sup>d</sup> Minomic International Ltd, Macquarie Park, NSW 2113, Australia

---

\* Corresponding author.

Email: [lidan@ciac.ac.cn](mailto:lidan@ciac.ac.cn)

[ekwang@ciac.ac.cn](mailto:ekwang@ciac.ac.cn)

[yuling.wang@mq.edu.au](mailto:yuling.wang@mq.edu.au)

#### Table of contents

|                  |                                                                                                                            |
|------------------|----------------------------------------------------------------------------------------------------------------------------|
| <b>Table S1</b>  | <b>Particle size and concentration of sEVs measured by NTA</b>                                                             |
| <b>Table S2</b>  | <b>Total sEV protein concentration measured by Micro BCA</b>                                                               |
| <b>Table S3</b>  | <b>The normalized SERS signal of individual biomarker and the average sum of these biomarkers (phenotypic signature)</b>   |
| <b>Table S4</b>  | <b>The definitions of 8th edition of TNM staging system of PDAC by AJCC</b>                                                |
| <b>Figure S1</b> | <b>Portable Raman reader</b>                                                                                               |
| <b>Figure S2</b> | <b>Characterization of SERS nanotags conjugated with MIL38 antibody</b>                                                    |
| <b>Figure S3</b> | <b>Bright field and confocal fluorescent images of plasma-derived sEVs (stained by Dil) captured by functionalized MBs</b> |
| <b>Figure S4</b> | <b>Specificity study of the SERS assay</b>                                                                                 |
| <b>Figure S5</b> | <b>CT and MRI images of P3 (T2N1M0)</b>                                                                                    |

**Table S1** Particle size and concentration of sEVs measured by NTA

| Sample No.          | Particle size (nm) | Concentration of sEVs in plasma (particles/mL) |
|---------------------|--------------------|------------------------------------------------|
| H1 (Healthy sample) | 82.1 ± 4.1         | (3.62 ± 0.27) ×10 <sup>8</sup>                 |
| H2                  | 94.1 ± 3.5         | (2.75 ± 0.15) ×10 <sup>8</sup>                 |
| H3                  | 77.1 ± 9.5         | (7.12 ± 0.07) ×10 <sup>8</sup>                 |
| H4                  | 94.1 ± 3.5         | (4.47 ± 0.13) ×10 <sup>8</sup>                 |
| H5                  | 66.4 ± 1.6         | (6.65 ± 0.67) ×10 <sup>8</sup>                 |
| H6                  | 88.8 ± 5.7         | (3.10 ± 0.70) ×10 <sup>8</sup>                 |
| P1 (patient sample) | 95.1 ± 1.5         | (2.35 ± 0.07) ×10 <sup>9</sup>                 |
| P2                  | 52.1 ± 27.8        | (6.75 ± 0.46) ×10 <sup>9</sup>                 |
| P3                  | 103.0 ± 7.9        | (2.59 ± 0.14) ×10 <sup>9</sup>                 |
| P4                  | 57.7 ± 33.4        | (1.49 ± 0.09) ×10 <sup>9</sup>                 |
| P5                  | 75.5 ± 2.7         | (1.60 ± 0.03) ×10 <sup>9</sup>                 |
| P6                  | 88.8 ± 5.7         | (2.77 ± 0.78) ×10 <sup>9</sup>                 |
| P7                  | 83.0 ± 3.7         | (7.90 ± 0.48) ×10 <sup>8</sup>                 |
| P8                  | 97.3 ± 2.4         | (2.52 ± 0.16) ×10 <sup>9</sup>                 |
| P9                  | 76.2 ± 3.2         | (1.15 ± 0.12) ×10 <sup>9</sup>                 |

**Table S2** Total sEV protein concentration measured by Micro BCA

| Sample No. | Protein concentration in plasma (µg/mL) |      |      | Ave (µg/mL) |
|------------|-----------------------------------------|------|------|-------------|
| H1         | 41.2                                    | 35.7 | 32.6 | 36.5 ± 4.4  |
| H2         | 35.8                                    | 33.3 | 47.2 | 38.8 ± 7.4  |
| H3         | 39.2                                    | 32.8 | 43.4 | 38.5 ± 5.3  |
| H4         | 28.5                                    | 47.7 | 38.3 | 38.2 ± 9.6  |
| H5         | 41.2                                    | 37.3 | 47.5 | 42.0 ± 5.1  |
| H6         | 36.5                                    | 40.8 | 44.3 | 40.5 ± 3.9  |
| P1         | 77.6                                    | 65.7 | 81.4 | 74.9 ± 8.2  |
| P2         | 68.5                                    | 70.3 | 65.9 | 68.2 ± 2.2  |
| P3         | 60.4                                    | 58.8 | 70.2 | 63.1 ± 6.2  |
| P4         | 63.6                                    | 48.4 | 53.6 | 55.2 ± 7.7  |
| P5         | 50.8                                    | 44.7 | 40.5 | 45.3 ± 5.2  |
| P6         | 44.1                                    | 38.9 | 45.8 | 42.9 ± 3.6  |
| P7         | 42.4                                    | 40.2 | 46.1 | 42.9 ± 3.0  |
| P8         | 55.3                                    | 45.4 | 51.2 | 50.6 ± 5.0  |
| P9         | 48.4                                    | 42.5 | 38.9 | 43.3 ± 4.8  |

**Table S3** The normalized SERS signal of individual biomarkers and the average sum of these biomarkers (phenotypic signature) (deviation of signature values were calculated based on  $\sqrt{E_1^2 + E_2^2 + E_3^2}$ , E1, E2 and E3 were deviations of normalized SERS signal of Glypican 1, EpCAM and CD44V6, respectively)

| Sample No. | Glypican 1  | EpCAM       | CD44V6      | Sum         |
|------------|-------------|-------------|-------------|-------------|
| H1         | 0.07 ± 0.00 | 0.22 ± 0.06 | 0.10 ± 0.01 | 0.39 ± 0.06 |
| H2         | 0.02 ± 0.02 | 0.08 ± 0.06 | 0.04 ± 0.05 | 0.14 ± 0.08 |
| H3         | 0.01 ± 0.01 | 0.07 ± 0.03 | 0.03 ± 0.02 | 0.11 ± 0.04 |
| H4         | 0.00 ± 0.00 | 0.08 ± 0.03 | 0.00 ± 0.00 | 0.08 ± 0.03 |
| H5         | 0.02 ± 0.01 | 0.11 ± 0.02 | 0.04 ± 0.01 | 0.17 ± 0.02 |
| H6         | 0.02 ± 0.02 | 0.11 ± 0.03 | 0.03 ± 0.02 | 0.16 ± 0.04 |
| H7         | 0.04 ± 0.00 | 0.12 ± 0.01 | 0.05 ± 0.00 | 0.21 ± 0.01 |
| H8         | 0.04 ± 0.01 | 0.07 ± 0.02 | 0.07 ± 0.02 | 0.18 ± 0.03 |
| H9         | 0.06 ± 0.02 | 0.21 ± 0.04 | 0.07 ± 0.03 | 0.34 ± 0.05 |
| H10        | 0.08 ± 0.04 | 0.11 ± 0.03 | 0.08 ± 0.03 | 0.27 ± 0.06 |
| H11        | 0.03 ± 0.00 | 0.11 ± 0.02 | 0.07 ± 0.03 | 0.21 ± 0.04 |
| H12        | 0.06 ± 0.06 | 0.10 ± 0.06 | 0.07 ± 0.06 | 0.23 ± 0.10 |
| H13        | 0.06 ± 0.02 | 0.21 ± 0.04 | 0.10 ± 0.04 | 0.37 ± 0.06 |
| P1         | 0.89 ± 0.54 | 1.00 ± 0.66 | 0.68 ± 0.48 | 2.57 ± 0.98 |
| P2         | 0.64 ± 0.10 | 0.74 ± 0.11 | 0.49 ± 0.13 | 1.87 ± 0.20 |
| P3         | 0.29 ± 0.25 | 0.54 ± 0.44 | 0.39 ± 0.27 | 1.22 ± 0.57 |
| P4         | 0.29 ± 0.06 | 0.50 ± 0.10 | 0.34 ± 0.09 | 1.13 ± 0.15 |
| P5         | 0.16 ± 0.01 | 0.31 ± 0.01 | 0.09 ± 0.09 | 0.56 ± 0.09 |
| P6         | 0.12 ± 0.01 | 0.29 ± 0.04 | 0.08 ± 0.01 | 0.49 ± 0.04 |
| P7         | 0.13 ± 0.03 | 0.18 ± 0.04 | 0.10 ± 0.00 | 0.41 ± 0.05 |
| P8         | 0.05 ± 0.01 | 0.46 ± 0.12 | 0.11 ± 0.02 | 0.62 ± 0.12 |
| P9         | 0.06 ± 0.01 | 0.31 ± 0.17 | 0.12 ± 0.00 | 0.49 ± 0.17 |

**Table S4** The definitions of 8th edition of TNM staging system of PDAC by AJCC

|    | Definition                                                                              | T stage   | N stage    | M stage | Overall cancer stage |
|----|-----------------------------------------------------------------------------------------|-----------|------------|---------|----------------------|
| T1 | Maximum tumor diameter $\leq 2$ cm                                                      | T1        | N0         | M0      | IA                   |
| T2 | $2 \text{ cm} < \text{Maximum tumor diameter} \leq 4 \text{ cm}$                        | T2        | N0         | M0      | IB                   |
| T3 | Maximum tumor diameter $> 4$ cm                                                         | T3        | N0         | M0      | IIA                  |
| T4 | Tumor involves the celiac axis, common hepatic artery or the superior mesenteric artery | T1-T3     | N1         | M0      | IIB                  |
| N0 | No regional lymph node metastasis                                                       | T4(any T) | Any N (N2) | M0      | III                  |
| N1 | Metastasis in 1-3 regional lymph nodes                                                  | Any T     | Any N      | M1      | IV                   |
| N2 | Metastasis in $\geq 4$ regional lymph nodes                                             |           |            |         |                      |
| M0 | No distant metastasis                                                                   |           |            |         |                      |
| M1 | Distant metastasis                                                                      |           |            |         |                      |

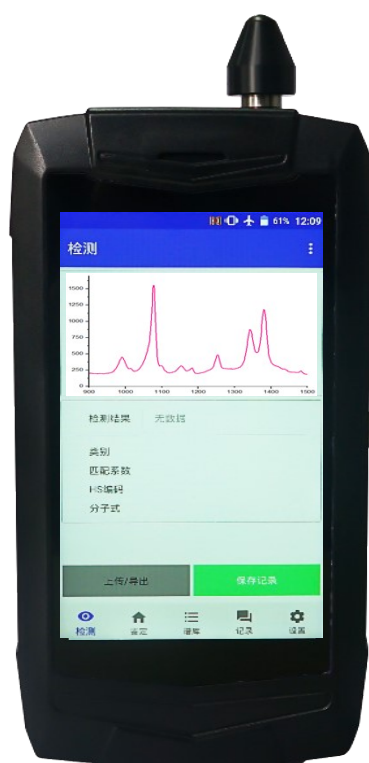

**Figure S1.** Portable Raman reader (EVA3000PLUS, Shanghai Oceanhood Opto-electronics Tech, China).

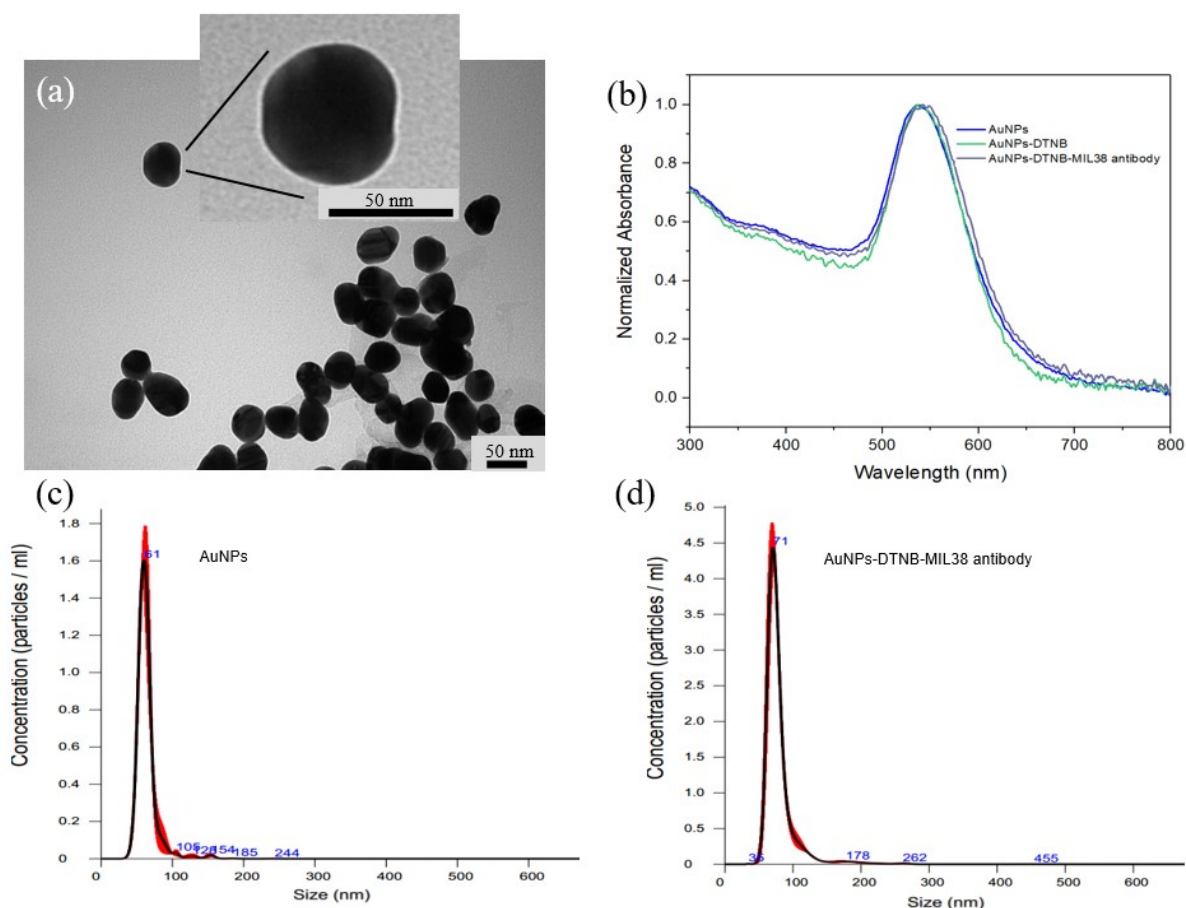

**Figure S2.** Characterization of SERS nanotags conjugated with MIL38 antibody. (a): TEM images of SERS nanotags with MIL38 antibody, showing round or oval-shaped morphology with a particle size around 65 nm. (b) UV-vis absorption spectra of AuNPs, AuNPs-DTNB and AuNPs-DTNB-MIL-38 antibody (SERS nanotags). The red shift of the UV-Vis absorption spectrum of AuNPs from 537 nm to 539 nm and 543 nm was seen due to a change of the surrounding refractive index of AuNPs. This confirmed the successful binding of Raman reporter molecules and MIL-38 antibodies onto the AuNPs. (c and d) Particle size distribution of AuNPs and AuNPs-DTNB-MIL-38 antibody measured by NTA. The average size of AuNPs-DTNB-MIL-38 antibody increased to 71 nm from 61 nm (AuNPs), indicating successful conjugation of antibody onto AuNPs.

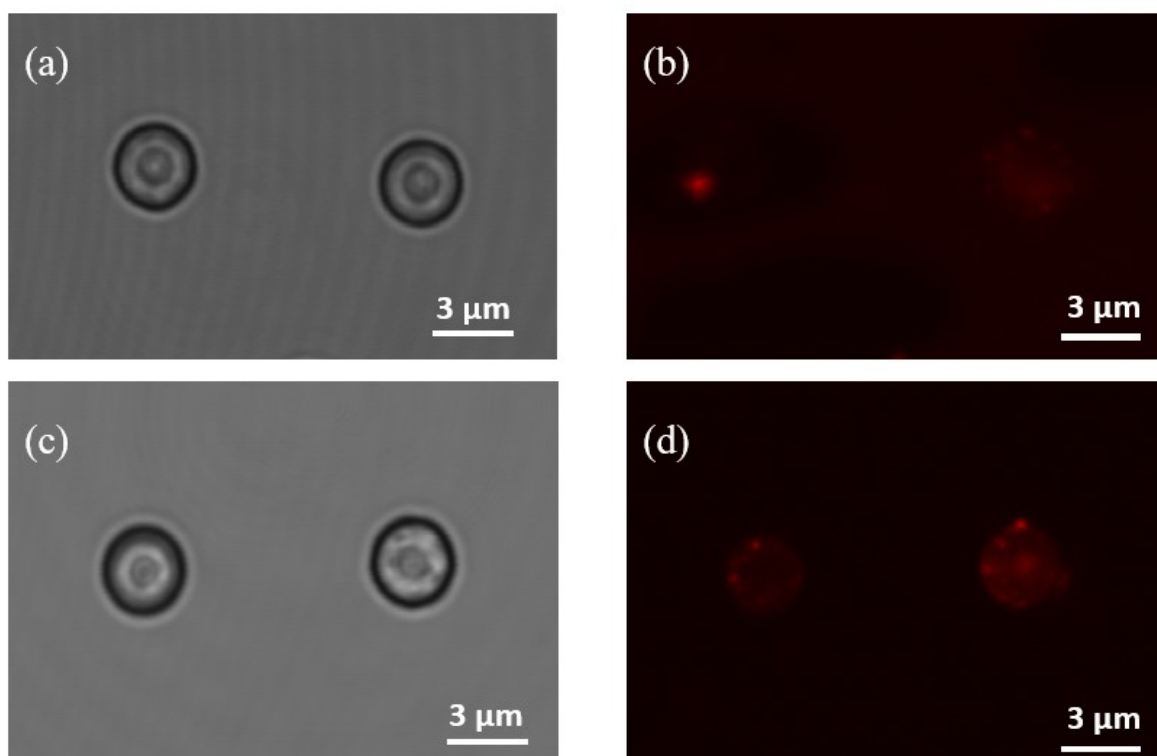

**Figure S3.** Bright field and confocal fluorescent images of plasma-derived sEVs (stained by Dil) captured by functionalized MBs. (a and b): Control, Dil incubated with functionalized MBs and showed low fluorescence around MBs, indicating low nonspecific binding between Dil and MBs; (c and d): The sEVs captured by functionalized MBs were stained with Dil have strong fluorescence around MBs, indicating the presence of sEVs on MBs.

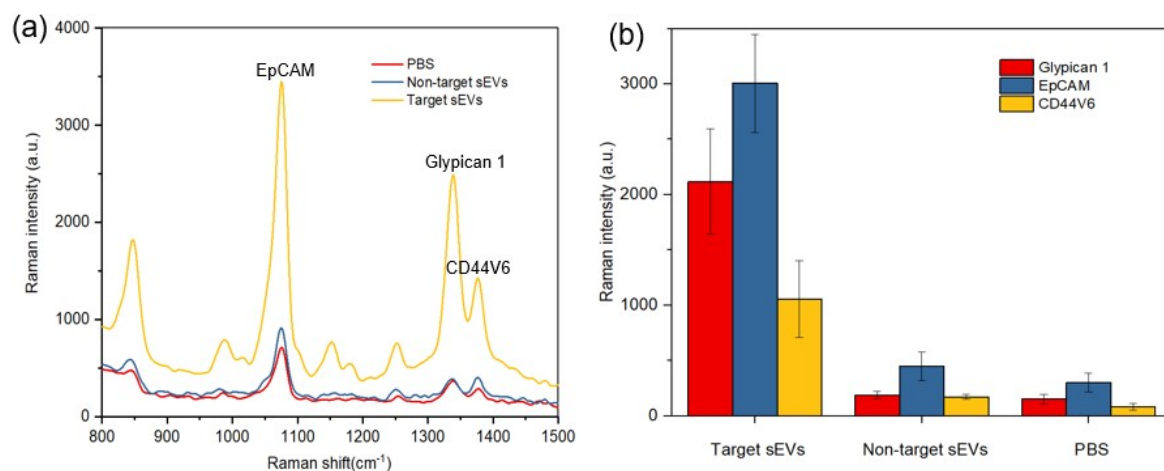

**Figure S4.** Specificity study of the SERS assay. (a): Raman spectra of PBS, non-target sEVs and target sEVs. (b) Histogram of Raman intensity corresponding to PBS, non-target sEVs and target sEVs. The low SERS signal from PBS and non-target sEVs demonstrated the high specificity of the proposed SERS assay. Target sEVs: patient plasma containing CD63 positive sEVs; non-target sEVs: patient plasma without CD63 positive sEVs (CD63 positive sEVs removed by magnetic beads conjugated with CD63 antibody).

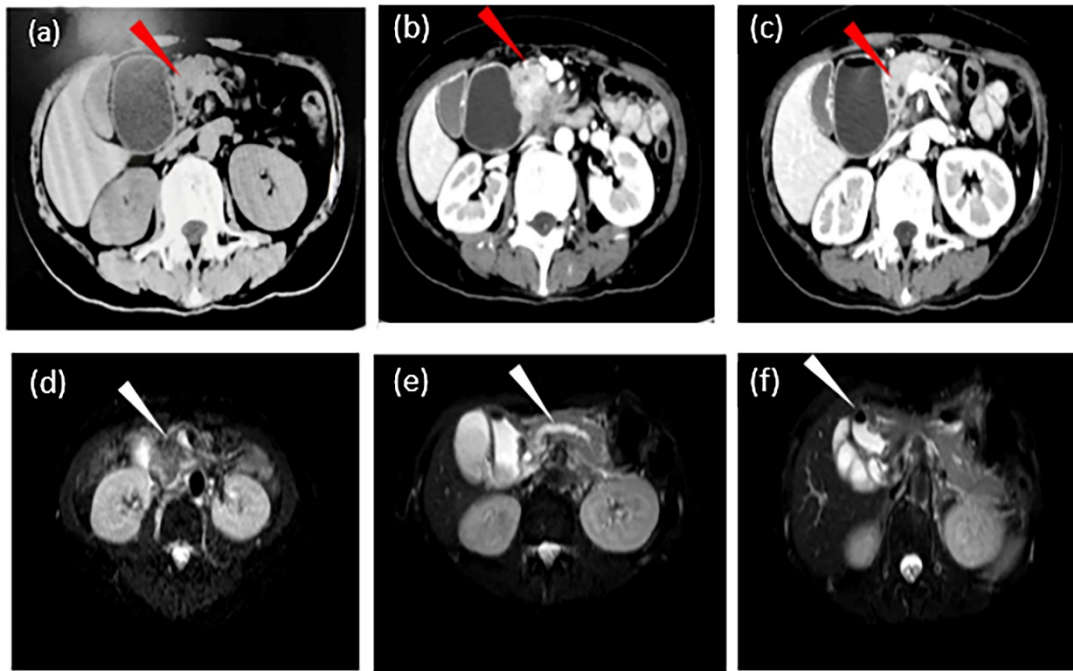

**Figure S5.** CT and MRI images of P3 (T2N1M0). (a) CT image of pancreas showed the maximum slice size around 31mm\*29 mm; (b and c) Enhanced CT images showed dilated descending duodenum, pancreatic duct and bulbous lumen and no abnormality in the size and shape in the neck, body and tail of the pancreas; (d to f) MRI T2 weighted images of pancreas showed dilated distal pancreatic duct and irregular shape of pancreas head.
